# Supplementary material for: Boletus edulis Extract—A New Modulator of Dysbiotic Microbiota
Source: MDPI journal article supplement (doi:10.3390/life13071481), 2023-06-30
Supplement: s1 [file s1]

Table S1. The pattern of phenolic compounds in the *B. edulis* extracts

| No | Compounds        | P1F1<br>( $\mu\text{g mL}^{-1}$ ) | P1F2<br>( $\mu\text{g mL}^{-1}$ ) | P1Fin<br>( $\mu\text{g DW}^{-1}$ )* |
|----|------------------|-----------------------------------|-----------------------------------|-------------------------------------|
| 1  | Hesperidin       | 10.561 $\pm$ 0.771                | 6.812 $\pm$ 0.340                 | 17.967 $\pm$ 0.621                  |
| 2  | Catechin         | 55.556 $\pm$ 1.136                | 28.643 $\pm$ 0.618                | 83.940 $\pm$ 0.137                  |
| 3  | Naringenin       | 13.773 $\pm$ 0.66                 | 5.649 $\pm$ 0.186                 | 17.077 $\pm$ 0.174                  |
| 4  | Rutin            | 152.619 $\pm$ 3.633               | 157.794 $\pm$ 3.443               | 311.476 $\pm$ 3.444                 |
| 5  | Cinnamic acid    | 3.326 $\pm$ 0.107                 | 3.622 $\pm$ 0.109                 | 6.829 $\pm$ 0.057                   |
| 6  | Chlorogenic acid | 4.590 $\pm$ 0.088                 | 3.495 $\pm$ 0.146                 | 9.239 $\pm$ 0.167                   |
| 7  | Sinapic acid     | 15.05 $\pm$ 0.435                 | 5.308 $\pm$ 0.026                 | 22.798 $\pm$ 0.111                  |
| 8  | Syringic acid    | 5.751 $\pm$ 0.094                 | 3.879 $\pm$ 0.107                 | 8.101 $\pm$ 0.101                   |
| 9  | Ferulic acid     | 2.778 $\pm$ 0.084                 | 4.376 $\pm$ 0.096                 | 7.218 $\pm$ 0.044                   |
| 10 | Myricetin        | 1.397 $\pm$ 0.093                 | 2.526 $\pm$ 0.078                 | 3.392 $\pm$ 0.016                   |

\* - DW-dry weight after atomization
