# Supplementary material for: Boletus edulis Extract—A New Modulator of Dysbiotic Microbiota
Source: MDPI journal article supplement (doi:10.3390/life13071481), 2023-06-30
Supplement: s1 [file s1]

**Table S2.** Concentrations of short-chain fatty acids in bacterial culture samples

| Sample          | Formic acid<br>g L <sup>-1</sup> | Oxalic acid<br>g L <sup>-1</sup> | Succinic acid<br>g L <sup>-1</sup> | Acetic acid<br>g L <sup>-1</sup> | Propionic acid<br>g L <sup>-1</sup> | Lactic acid<br>g L <sup>-1</sup> | Butyric acid<br>g L <sup>-1</sup> | Benzoic acid<br>g L <sup>-1</sup> | Izovaleric acid<br>g L <sup>-1</sup> | Phenyl lactic acid<br>g L <sup>-1</sup> | 3-(-4-hydroxyphenyl) lactic acid<br>g L <sup>-1</sup> |
|-----------------|----------------------------------|----------------------------------|------------------------------------|----------------------------------|-------------------------------------|----------------------------------|-----------------------------------|-----------------------------------|--------------------------------------|-----------------------------------------|-------------------------------------------------------|
| <b>M</b>        | 0.158±0.028                      | 0.005±0.00                       | 0.087±0.006                        | 0.292±0.016                      | 0.377±0.031                         | 0.889±0.003                      | 0.060±0.001                       | 1.71±0.10                         | 0.061±0.002                          | 0.004±0.00                              | 0.002±0.00                                            |
| <b>W1</b>       | -                                | 0.004±0.00                       | 0.256±0.002                        | 0.767±0.010                      | 0.017±0.001                         | 5.291±0.086                      | 0.886±0.024                       | 1.71±0.05                         | 0.370±0.030                          | 0.007±0.00                              | 0.003±0.00                                            |
| <b>W2</b>       | -                                | -                                | 0.175±0.002                        | 0.832±0.025                      | 0.050±0.001                         | 5.960±0.100                      | 0.060±0.011                       | 1.60±0.07                         | 0.306±0.002                          | 0.006±0.00                              | 0.003±0.00                                            |
| <b>W3</b>       | 0.062±0.002                      | 0.006±0.00                       | 0.310±0.003                        | 2.131±0.019                      | 0.042±0.006                         | 11.348±0.106                     | 1.524±0.012                       | 1.34±0.10                         | 0.567±0.030                          | 0.010±0.001                             | 0.006±0.00                                            |
| <b>W4</b>       | 0.064±0.003                      | 0.007±0.00                       | 0.286±0.007                        | 2.044±0.010                      | 0.026±0.001                         | 16.114±0.384                     | 0.105±0.003                       | 7.87±0.15                         | 0.562±0.030                          | 0.010±0.001                             | 0.007±0.00                                            |
| <b>Ma</b>       | 0.111±0.023                      | -                                | 0.181±0.004                        | 0.344±0.05                       | 0.061±0.00                          | 0.745±0.040                      | 0.039±0.002                       | -                                 | 0.272±0.012                          | 0.010±0.000                             | -                                                     |
| <b>Antib P1</b> | 0.253±0.038                      | 0.053±0.006                      | 0.522±0.014                        | 0.763±0.03                       | 0.823±0.018                         | 2.129±0.060                      | 0.344±0.013                       | 0.501±0.005                       | 2.408±0.130                          | -                                       | 0.077±0.006                                           |
| <b>W1</b>       | 0.488±0.037                      | 0.111±0.001                      | 0.493±0.012                        | 1.103±0.043                      | 0.491±0.015                         | 1.069±0.014                      | 0.548±0.035                       | 0.735±0.010                       | 2.678±0.110                          | 0.154±0.000                             | 0.022±0.000                                           |
| <b>W2</b>       | 0.422±0.039                      | 0.100±0.002                      | 0.259±0.014                        | 1.190±0.036                      | 0.346±0.003                         | 1.423±0.056                      | 1.179±0.061                       | 0.417±0.001                       | 1.583±0.031                          | 0.110±0.004                             | 0.020±0.000                                           |
| <b>W3</b>       | -                                | 0.009±0.00                       | 0.354±0.003                        | 0.744±0.052                      | 0.162±0.00                          | 2.270±0.029                      | 0.495±0.04                        | -                                 | 0.688±0.020                          | -                                       | 0.052±0.001                                           |
| <b>W4</b>       | -                                | 0.006±0.00                       | 0.306±0.012                        | 0.584±0.026                      | 0.179±0.018                         | 2.001±0.020                      | 0.518±0.006                       | -                                 | 0.601±0.010                          | -                                       | 0.011±0.000                                           |
